# Supplementary material for: Identification and Comprehensive Analysis of the Nuclear Factor-Y Family Genes Reveal Their Multiple Roles in Response to Nutrient Deficiencies in Brassica napus
Source: MDPI journal article supplement (doi:10.3390/ijms221910354), 2021-09-26
Supplement: s1 [file s1]

**Table S1. Statistics of the *NF-Y* genes in each *NF-Y* subfamily in *Arabidopsis* and three *Brassica* species**

| Type  | Family  | <i>Arabidopsis thaliana</i> | <i>Brassica oleracea</i> | <i>Brassica rapa</i> | <i>Brassica napus</i> |
|-------|---------|-----------------------------|--------------------------|----------------------|-----------------------|
| NF-YA | NF-YA1  | 1                           | 3                        | 3                    | 6                     |
|       | NF-YA2  | 1                           | 3                        | 2                    | 4                     |
|       | NF-YA3  | 1                           | 7                        | 2                    | 7                     |
|       | NF-YA4  | 1                           | 1                        | 1                    | 2                     |
|       | NF-YA5  | 1                           | 2                        | 3                    | 6                     |
|       | NF-YA6  | 1                           | 2                        | 1                    | 3                     |
|       | NF-YA7  | 1                           | 1                        | 1                    | 2                     |
|       | NF-YA8  | 1                           | 1                        | 1                    | 1                     |
|       | NF-YA9  | 1                           | 1                        | 3                    | 5                     |
|       | NF-YA10 | 1                           | 1                        | 1                    | 2                     |
| NF-YB | NF-YB1  | 1                           | 2                        | 1                    | 4                     |
|       | NF-YB2  | 1                           | 2                        | 2                    | 5                     |
|       | NF-YB3  | 1                           | 3                        | 3                    | 5                     |
|       | NF-YB4  | 1                           | 1                        | 1                    | 1                     |
|       | NF-YB5  | 1                           | 2                        | 2                    | 3                     |
|       | NF-YB6  | 1                           | 2                        | 2                    | 4                     |
|       | NF-YB7  | 1                           | 2                        | 2                    | 4                     |
|       | NF-YB8  | 1                           | 2                        | 2                    | 5                     |
|       | NF-YB9  | 1                           | 3                        | 3                    | 4                     |
|       | NF-YB10 | 1                           | 1                        | 1                    | 2                     |
|       | NF-YB11 | 1                           | 1                        | 1                    | 3                     |
|       | NF-YB12 | 1                           | 4                        | 2                    | 4                     |
|       | NF-YB13 | 1                           | 2                        | 2                    | 2                     |
| NF-YC | NF-YC1  | 1                           | /                        | /                    | /                     |
|       | NF-YC2  | 1                           | 1                        | 1                    | /                     |
|       | NF-YC3  | 1                           | /                        | /                    | /                     |
|       | NF-YC4  | 1                           | 3                        | 2                    | 5                     |
|       | NF-YC5  | 1                           | /                        | /                    | /                     |
|       | NF-YC6  | 1                           | /                        | /                    | /                     |
|       | NF-YC7  | 1                           | /                        | /                    | /                     |
|       | NF-YC8  | 1                           | /                        | /                    | /                     |
|       | NF-YC9  | 1                           | 2                        | 3                    | 6                     |
|       | NF-YC10 | 1                           | 2                        | 2                    | 4                     |
|       | NF-YC11 | 1                           | 3                        | 3                    | 7                     |
|       | NF-YC12 | 1                           | 1                        | /                    | /                     |
|       | NF-YC13 | 1                           | 1                        | 1                    | 2                     |
| Total | 36      | 36                          | 62                       | 54                   | 108                   |

**Table S2. Copy number variations of the *NF-Y* family in higher plants**

| <b>Item</b>                 | <b>NF-YA</b> | <b>NF-YB</b> | <b>NF-YC</b> | <b>Total</b> | <b>Reference</b>                               |
|-----------------------------|--------------|--------------|--------------|--------------|------------------------------------------------|
| <i>Arabidopsis thaliana</i> | 10           | 13           | 13           | 36           | TAIR database                                  |
| <i>Brassica napus</i>       | 38           | 46           | 24           | 108          | BLAST search in genome database                |
| <i>Brassica oleracea</i>    | 22           | 27           | 13           | 62           | BLAST search in genome database                |
| <i>Brassica rapa</i>        | 18           | 24           | 12           | 54           | BLAST search in genome database                |
| <i>Camellia sinensis</i>    | 10           | 16           | 13           | 39           | Planta. 2019, 250(5): 1671-1686                |
| <i>Glycine max</i>          | 21           | 32           | 15           | 68           | Mol Genetics Genomics. 2015, 290(3): 1095-1115 |
| <i>Juglans regia</i>        | 17           | 9            | 7            | 33           | BMC Plant Biology. 2018, 18(1): 255            |
| <i>Malus Domestica</i>      | 11           | 22           | 10           | 43           | Plants-Basel. 2020, 10(1): 16                  |
| <i>Manihot esculenta</i>    | 15           | 21           | 15           | 51           | Annals of Botany. 2020, 124(7): 1185-1197      |
| <i>Petunia hybrida</i>      | 10           | 13           | 4            | 27           | Plants-Basel. 2020, 9(3): 336                  |
| <i>Populus trichocarpa</i>  | 13           | 20           | 19           | 52           | Physiologia plantarum. 2021, 171(3): 309-327   |
| <i>Prunus persica</i>       | 6            | 12           | 6            | 24           | BMC Genomics. 2019, 20(1): 612                 |
| <i>Sorghum bicolor</i>      | 8            | 11           | 14           | 33           | Physiol Mol Biol Plants. 2016, 22(1): 33-49    |
| <i>Triticum aestivum</i>    | 10           | 11           | 14           | 35           | Plant Mol Biol. 2007, 65(1-2): 77-92           |

**Table S3. Characteristics of the *NF-Y* family members in *B. napus* and subcellular localization prediction**

| Gene name             | Gene ID       | Gene position |          |          | Gene length (bp) | Protein length (aa) | MW (Da)  | PI   | GRAVY  | Intron number | Subcellular location |
|-----------------------|---------------|---------------|----------|----------|------------------|---------------------|----------|------|--------|---------------|----------------------|
|                       |               | Chrom.        | Start    | End      |                  |                     |          |      |        |               |                      |
| <i>BnaA02.NF-YA1</i>  | BnaA02g01270D | A2            | 566388   | 567760   | 1004             | 236                 | 26098.88 | 6.67 | -1.060 | 4             | nucl                 |
| <i>BnaA03.NF-YA1</i>  | BnaA03g04040D | A3            | 1883229  | 1884845  | 799              | 205                 | 22509.00 | 8.58 | -0.903 | 5             | nucl                 |
| <i>BnaA10.NF-YA1</i>  | BnaA10g29990D | A10_R         | 2015895  | 2018378  | 1655             | 284                 | 30815.79 | 6.35 | -1.018 | 4             | nucl                 |
| <i>BnaC02.NF-YA1</i>  | BnaC02g04360D | C2            | 2225135  | 2226235  | 660              | 219                 | 24700.16 | 9.63 | -0.629 | 5             | nucl                 |
| <i>BnaC03.NF-YA1</i>  | BnaC03g05640D | C3            | 2717638  | 2719734  | 1522             | 259                 | 28567.61 | 8.52 | -0.983 | 4             | nucl                 |
| <i>BnaC09.NF-YA1</i>  | BnaC09g44190D | C9            | 45143706 | 45146146 | 1645             | 285                 | 31064.05 | 6.11 | -1.019 | 4             | nucl                 |
| <i>BnaA03.NF-YA2</i>  | BnaA03g29140D | A3            | 14170614 | 14171911 | 846              | 281                 | 30995.03 | 9.75 | -0.625 | 3             | nucl                 |
| <i>BnaAnn.NF-YA2</i>  | BnaAnng02740D | An_R          | 2235220  | 2236987  | 1105             | 274                 | 29736.43 | 9.39 | -0.511 | 3             | nucl                 |
| <i>BnaC05.NF-YA2a</i> | BnaC05g46110D | C5            | 41750761 | 41751533 | 540              | 179                 | 20294.87 | 9.51 | -0.777 | 3             | nucl                 |
| <i>BnaC05.NF-YA2b</i> | BnaC05g19190D | C5            | 12704323 | 12706125 | 1351             | 281                 | 30995.03 | 9.75 | -0.625 | 3             | nucl                 |
| <i>BnaA02.NF-YA3</i>  | BnaA02g16180D | A2            | 9628040  | 9630116  | 1742             | 291                 | 32281.88 | 8.89 | -0.842 | 3             | nucl                 |
| <i>BnaA07.NF-YA3</i>  | BnaA07g30460D | A7            | 21566941 | 21569044 | 1707             | 322                 | 35644.00 | 9.36 | -0.707 | 4             | nucl                 |
| <i>BnaC02.NF-YA3</i>  | BnaC02g21570D | C2            | 18560619 | 18562639 | 1686             | 319                 | 35316.44 | 9.03 | -0.742 | 3             | nucl                 |
| <i>BnaC04.NF-YA3</i>  | BnaC04g27090D | C4            | 28335962 | 28336402 | 441              | 146                 | 16422.19 | 8.58 | 0.027  | 0             | nucl                 |
| <i>BnaC06.NF-YA3a</i> | BnaC06g33980D | C6            | 33618683 | 33620678 | 1032             | 343                 | 38150.04 | 9.37 | -0.663 | 5             | nucl                 |
| <i>BnaC06.NF-YA3b</i> | BnaC06g33950D | C6            | 33612111 | 33612907 | 723              | 240                 | 27265.27 | 9.72 | 0.023  | 1             | chlo                 |
| <i>BnaCnn.NF-YA3</i>  | BnaCnng68450D | Cn_R          | 68066532 | 68068714 | 1372             | 405                 | 46094.97 | 9.73 | -0.788 | 5             | nucl                 |
| <i>BnaA05.NF-YA4</i>  | BnaA05g09110D | A5            | 5018220  | 5020045  | 1152             | 197                 | 22197.77 | 8.72 | -1.024 | 4             | nucl                 |
| <i>BnaC04.NF-YA4</i>  | BnaC04g10470D | C4            | 8048154  | 8050217  | 1404             | 196                 | 22080.65 | 8.93 | -1.019 | 4             | nucl                 |
| <i>BnaA06.NF-YA5</i>  | BnaA06g01280D | A6            | 817024   | 818933   | 1655             | 285                 | 31425.95 | 9.58 | -0.769 | 3             | nucl                 |
| <i>BnaA08.NF-YA5</i>  | BnaA08g00840D | A8            | 610760   | 612272   | 1236             | 228                 | 25409.68 | 9.45 | -0.613 | 3             | nucl                 |
| <i>BnaAnn.NF-YA5</i>  | BnaAnng31560D | An_R          | 36113417 | 36115159 | 1470             | 231                 | 25671.99 | 9.90 | -0.670 | 3             | nucl                 |

|                       |               |      |          |          |      |     |          |       |        |   |      |
|-----------------------|---------------|------|----------|----------|------|-----|----------|-------|--------|---|------|
| <i>BnaC06.NF-YA5a</i> | BnaC06g10580D | C6   | 12712609 | 12714019 | 1157 | 235 | 25964.24 | 9.81  | -0.640 | 3 | nucl |
| <i>BnaC06.NF-YA5b</i> | BnaC06g06950D | C6   | 7497997  | 7499985  | 1772 | 299 | 32869.73 | 9.39  | -0.626 | 4 | nucl |
| <i>BnaCnn.NF-YA5</i>  | BnaCnng30790D | Cn_R | 29265164 | 29266560 | 1170 | 234 | 26028.40 | 9.61  | -0.669 | 3 | nucl |
| <i>BnaA01.NF-YA6</i>  | BnaA01g29650D | A1   | 20492147 | 20493570 | 1034 | 308 | 33768.87 | 9.83  | -0.638 | 4 | nucl |
| <i>BnaC01.NF-YA6</i>  | BnaC01g37260D | C1   | 36403731 | 36405134 | 1034 | 308 | 33961.12 | 9.73  | -0.632 | 4 | nucl |
| <i>BnaCnn.NF-YA6</i>  | BnaCnng46640D | Cn_R | 46011390 | 46011869 | 324  | 107 | 12211.62 | 5.56  | -0.487 | 1 | nucl |
| <i>BnaA09.NF-YA7</i>  | BnaA09g26040D | A9   | 19158540 | 19160295 | 961  | 183 | 20800.31 | 9.04  | -1.033 | 4 | nucl |
| <i>BnaC05.NF-YA7</i>  | BnaC05g23480D | C5   | 17579844 | 17581479 | 843  | 183 | 20802.31 | 9.06  | -1.007 | 4 | nucl |
| <i>BnaA09.NF-YA8</i>  | BnaA09g44920D | A9   | 30778841 | 30780472 | 1186 | 322 | 35799.66 | 9.02  | -0.856 | 4 | nucl |
| <i>BnaA01.NF-YA9</i>  | BnaA01g25500D | A1   | 17797274 | 17799488 | 763  | 180 | 20509.28 | 10.55 | -1.228 | 2 | nucl |
| <i>BnaA03.NF-YA9</i>  | BnaA03g35980D | A3   | 17592029 | 17593794 | 1350 | 280 | 31103.08 | 8.97  | -1.185 | 4 | nucl |
| <i>BnaA05.NF-YA9</i>  | BnaA05g19990D | A5   | 15425888 | 15427902 | 1478 | 294 | 32395.42 | 6.36  | -1.090 | 4 | nucl |
| <i>BnaC03.NF-YA9</i>  | BnaC03g41820D | C3   | 26687276 | 26689145 | 1442 | 298 | 32927.06 | 8.92  | -1.139 | 4 | nucl |
| <i>BnaC05.NF-YA9</i>  | BnaC05g31370D | C5   | 30686248 | 30688424 | 1605 | 298 | 32912.16 | 8.84  | -1.107 | 4 | nucl |
| <i>BnaA10.NF-YA10</i> | BnaA10g24470D | A10  | 15949384 | 15950501 | 853  | 267 | 29845.72 | 9.46  | -0.675 | 3 | nucl |
| <i>BnaC09.NF-YA10</i> | BnaC09g49050D | C9   | 47617066 | 47618130 | 804  | 267 | 29624.62 | 9.42  | -0.578 | 3 | nucl |
| <i>BnaA03.NF-YB1</i>  | BnaA03g18200D | A3   | 8535232  | 8536613  | 756  | 166 | 18111.55 | 5.52  | -0.331 | 2 | nucl |
| <i>BnaA05.NF-YB1</i>  | BnaA05g06260D | A5   | 3332868  | 3334807  | 1341 | 142 | 15283.00 | 4.95  | -0.683 | 2 | nucl |
| <i>BnaC03.NF-YB1</i>  | BnaC03g21730D | C3   | 11759347 | 11760703 | 750  | 164 | 18071.54 | 5.23  | -0.201 | 2 | nucl |
| <i>BnaC04.NF-YB1</i>  | BnaC04g06490D | C4   | 4728865  | 4731076  | 912  | 212 | 23063.97 | 8.09  | -0.570 | 4 | nucl |
| <i>BnaA02.NF-YB2</i>  | BnaA02g25600D | A2   | 18785085 | 18785860 | 776  | 186 | 19901.88 | 5.96  | -0.885 | 0 | nucl |
| <i>BnaA09.NF-YB2</i>  | BnaA09g18400D | A9   | 11446337 | 11447022 | 686  | 184 | 19883.80 | 9.96  | -0.962 | 0 | nucl |
| <i>BnaC02.NF-YB2</i>  | BnaC02g33400D | C2   | 35853002 | 35853683 | 682  | 185 | 19967.00 | 6.30  | -0.894 | 0 | nucl |
| <i>BnaC07.NF-YB2</i>  | BnaC07g20390D | C7   | 27011240 | 27011748 | 405  | 134 | 14620.21 | 4.80  | -0.640 | 1 | chlo |
| <i>BnaC09.NF-YB2</i>  | BnaC09g20320D | C9   | 17368804 | 17369486 | 683  | 187 | 20177.12 | 6.07  | -0.943 | 0 | nucl |
| <i>BnaA01.NF-YB3</i>  | BnaA01g28350D | A1   | 19803940 | 19804416 | 477  | 158 | 17024.90 | 6.06  | -0.773 | 0 | nucl |

|                       |               |      |          |          |      |     |          |      |        |   |      |
|-----------------------|---------------|------|----------|----------|------|-----|----------|------|--------|---|------|
| <i>BnaA03.NF-YB3</i>  | BnaA03g33970D | A3   | 16504578 | 16505412 | 835  | 189 | 19644.46 | 6.16 | -0.755 | 0 | nucl |
| <i>BnaC01.NF-YB3</i>  | BnaC01g35600D | C1   | 35046879 | 35047591 | 713  | 157 | 16829.72 | 6.21 | -0.738 | 0 | nucl |
| <i>BnaC03.NF-YB3</i>  | BnaC03g39380D | C3   | 24331939 | 24332773 | 835  | 186 | 19548.41 | 6.30 | -0.796 | 0 | nucl |
| <i>BnaC05.NF-YB3</i>  | BnaC05g37390D | C5   | 36433213 | 36433710 | 498  | 165 | 17461.26 | 5.95 | -0.756 | 0 | nucl |
| <i>BnaC05.NF-YB4</i>  | BnaC05g06570D | C5   | 3248229  | 3248627  | 399  | 132 | 14857.47 | 6.15 | -0.831 | 0 | mito |
| <i>BnaA03.NF-YB5</i>  | BnaA03g21860D | A3   | 10344600 | 10345070 | 471  | 156 | 17901.02 | 6.38 | -0.900 | 0 | nucl |
| <i>BnaA05.NF-YB5</i>  | BnaA05g00200D | A5   | 100806   | 101457   | 519  | 172 | 19841.33 | 6.50 | -0.783 | 1 | nucl |
| <i>BnaC04.NF-YB5</i>  | BnaC04g00090D | C4   | 31312    | 31998    | 687  | 155 | 17617.76 | 6.70 | -0.852 | 0 | nucl |
| <i>BnaA06.NF-YB6</i>  | BnaA06g35340D | A6   | 23271611 | 23272448 | 696  | 231 | 25910.02 | 6.18 | -0.723 | 1 | nucl |
| <i>BnaA09.NF-YB6</i>  | BnaA09g18420D | A9   | 11452614 | 11453343 | 665  | 209 | 23339.17 | 5.98 | -0.666 | 1 | nucl |
| <i>BnaC07.NF-YB6</i>  | BnaC07g20410D | C7   | 27026011 | 27028908 | 1995 | 642 | 73177.87 | 7.61 | -0.800 | 3 | nucl |
| <i>BnaC09.NF-YB6</i>  | BnaC09g20350D | C9   | 17373524 | 17374297 | 702  | 207 | 23164.04 | 5.98 | -0.616 | 1 | nucl |
| <i>BnaA03.NF-YB7</i>  | BnaA03g38390D | A3   | 19081916 | 19082545 | 630  | 209 | 23901.25 | 5.84 | -1.107 | 0 | nucl |
| <i>BnaA09.NF-YB7</i>  | BnaA09g08330D | A9   | 4084474  | 4085100  | 627  | 208 | 23718.17 | 5.84 | -1.056 | 0 | nucl |
| <i>BnaC03.NF-YB7</i>  | BnaC03g45220D | C3   | 30228273 | 30228902 | 630  | 209 | 23897.26 | 5.84 | -1.111 | 0 | nucl |
| <i>BnaC09.NF-YB7</i>  | BnaC09g08600D | C9   | 5489196  | 5489822  | 627  | 208 | 23791.22 | 5.58 | -1.053 | 0 | nucl |
| <i>BnaA03.NF-YB8</i>  | BnaA03g16960D | A3   | 7957582  | 7959701  | 954  | 267 | 29515.26 | 8.80 | -0.563 | 7 | nucl |
| <i>BnaA04.NF-YB8a</i> | BnaA04g21270D | A4   | 16208767 | 16210237 | 585  | 194 | 21354.82 | 7.75 | -0.634 | 3 | nucl |
| <i>BnaA04.NF-YB8b</i> | BnaA04g21250D | A4   | 16196319 | 16197903 | 528  | 175 | 19276.37 | 6.42 | -0.818 | 4 | nucl |
| <i>BnaC03.NF-YB8</i>  | BnaC03g20500D | C3   | 10865305 | 10867168 | 669  | 222 | 24355.50 | 8.98 | -0.577 | 6 | nucl |
| <i>BnaCnn.NF-YB8</i>  | BnaCnng76740D | Cn_R | 77820665 | 77822121 | 561  | 186 | 20667.95 | 6.97 | -0.677 | 3 | nucl |
| <i>BnaA07.NF-YB9</i>  | BnaA07g10770D | A7   | 10129311 | 10131376 | 893  | 231 | 25381.37 | 5.96 | -0.702 | 1 | nucl |
| <i>BnaAnn.NF-YB9</i>  | BnaAnng04140D | An_R | 4158907  | 4163093  | 1283 | 342 | 37734.63 | 5.50 | -0.391 | 2 | plas |
| <i>BnaC07.NF-YB9</i>  | BnaC07g14150D | C7   | 19943199 | 19945282 | 886  | 230 | 25358.34 | 5.96 | -0.701 | 1 | nucl |
| <i>BnaCnn.NF-YB9</i>  | BnaCnng59920D | Cn_R | 59697476 | 59698858 | 903  | 300 | 33181.05 | 5.39 | -0.568 | 1 | nucl |
| <i>BnaA09.NF-YB10</i> | BnaA09g33640D | A9   | 24770165 | 24772100 | 967  | 257 | 28388.05 | 9.44 | -0.574 | 6 | nucl |

|                       |               |      |          |          |      |     |          |      |        |   |      |
|-----------------------|---------------|------|----------|----------|------|-----|----------|------|--------|---|------|
| <i>BnaC08.NF-YB10</i> | BnaC08g24430D | C8   | 26421510 | 26423319 | 942  | 229 | 25235.36 | 9.62 | -0.843 | 6 | nucl |
| <i>BnaA07.NF-YB11</i> | BnaA07g13230D | A7   | 11774794 | 11775938 | 814  | 218 | 24038.64 | 4.34 | -1.267 | 2 | nucl |
| <i>BnaC03.NF-YB11</i> | BnaC03g47130D | C3   | 32107109 | 32108310 | 830  | 211 | 23501.18 | 4.42 | -1.358 | 2 | nucl |
| <i>BnaC04.NF-YB11</i> | BnaC04g16850D | C4   | 14822766 | 14823867 | 746  | 214 | 23519.08 | 4.36 | -1.244 | 2 | nucl |
| <i>BnaA10.NF-YB12</i> | BnaA10g23160D | A10  | 15378003 | 15379167 | 901  | 165 | 18428.65 | 4.57 | -0.624 | 3 | chlo |
| <i>BnaAnn.NF-YB12</i> | BnaAnng06230D | An_R | 6195869  | 6197811  | 747  | 248 | 28398.43 | 6.72 | -0.577 | 4 | nucl |
| <i>BnaC02.NF-YB12</i> | BnaC02g01260D | C2   | 517056   | 519849   | 1629 | 240 | 27347.38 | 6.93 | -0.523 | 5 | cyto |
| <i>BnaC09.NF-YB12</i> | BnaC09g47720D | C9   | 46915815 | 46917083 | 964  | 166 | 18443.63 | 4.57 | -0.651 | 3 | chlo |
| <i>BnaA09.NF-YB13</i> | BnaA09g05430D | A9   | 2669540  | 2671009  | 1113 | 169 | 19047.31 | 4.74 | -0.755 | 4 | chlo |
| <i>BnaC09.NF-YB13</i> | BnaC09g05000D | C9   | 2888970  | 2890360  | 1061 | 169 | 19061.33 | 4.74 | -0.754 | 4 | chlo |
| <i>BnaA06.NF-YC4</i>  | BnaA06g16420D | A6   | 9223546  | 9224734  | 1189 | 221 | 24244.41 | 5.06 | -0.400 | 0 | nucl |
| <i>BnaAnn.NF-YC4</i>  | BnaAnng22700D | An_R | 25505210 | 25506448 | 1113 | 273 | 29633.70 | 5.17 | -0.285 | 3 | chlo |
| <i>BnaC03.NF-YC4</i>  | BnaC03g50810D | C3   | 35230481 | 35231749 | 1144 | 283 | 30821.17 | 5.54 | -0.292 | 2 | chlo |
| <i>BnaC08.NF-YC4</i>  | BnaC08g20340D | C8   | 23076932 | 23078225 | 1294 | 221 | 24301.47 | 5.06 | -0.414 | 0 | nucl |
| <i>BnaCnn.NF-YC4</i>  | BnaCnng15880D | Cn_R | 14839773 | 14840940 | 1011 | 264 | 29559.47 | 5.09 | -0.381 | 2 | chlo |
| <i>BnaA06.NF-YC9</i>  | BnaA06g05230D | A6   | 2982168  | 2983799  | 1400 | 220 | 24496.60 | 5.23 | -0.535 | 1 | nucl |
| <i>BnaA08.NF-YC9</i>  | BnaA08g26690D | A8   | 17990349 | 17991630 | 1201 | 191 | 21299.78 | 5.13 | -0.688 | 1 | nucl |
| <i>BnaA09.NF-YC9</i>  | BnaA09g48620D | A9   | 32533160 | 32534650 | 1491 | 228 | 25421.53 | 5.10 | -0.665 | 0 | nucl |
| <i>BnaC05.NF-YC9</i>  | BnaC05g06520D | C5   | 3224198  | 3228539  | 2674 | 327 | 36931.74 | 7.08 | -0.641 | 2 | mito |
| <i>BnaC08.NF-YC9</i>  | BnaC08g42880D | C8   | 36874233 | 36875771 | 1382 | 254 | 28661.58 | 5.75 | -0.477 | 2 | nucl |
| <i>BnaCnn.NF-YC9</i>  | BnaCnng06510D | Cn_R | 5706615  | 5711120  | 891  | 296 | 33273.15 | 9.44 | -0.462 | 3 | chlo |
| <i>BnaA06.NF-YC10</i> | BnaA06g04450D | A6   | 2644126  | 2645359  | 534  | 177 | 20110.71 | 8.51 | -0.927 | 3 | nucl |
| <i>BnaA09.NF-YC10</i> | BnaA09g49120D | A9   | 32763228 | 32764356 | 705  | 181 | 20346.87 | 9.04 | -0.931 | 3 | nucl |
| <i>BnaC05.NF-YC10</i> | BnaC05g05650D | C5   | 2744017  | 2745474  | 733  | 182 | 20606.17 | 9.04 | -0.925 | 3 | nucl |
| <i>BnaC08.NF-YC10</i> | BnaC08g43430D | C8   | 37158427 | 37160035 | 726  | 182 | 20412.79 | 8.87 | -1.004 | 3 | nucl |
| <i>BnaA01.NF-YC11</i> | BnaA01g30580D | A1   | 20947665 | 20949601 | 1079 | 289 | 31884.32 | 4.99 | -0.936 | 5 | chlo |

|                        |               |     |          |          |      |     |          |      |        |   |      |
|------------------------|---------------|-----|----------|----------|------|-----|----------|------|--------|---|------|
| <i>BnaA03.NF-YC11</i>  | BnaA03g32260D | A3  | 15566754 | 15568973 | 1064 | 287 | 31999.61 | 5.02 | -0.894 | 5 | chlo |
| <i>BnaA10.NF-YC11</i>  | BnaA10g23530D | A10 | 15532923 | 15534807 | 1135 | 299 | 33266.07 | 5.08 | -0.892 | 5 | chlo |
| <i>BnaC01.NF-YC11</i>  | BnaC01g38370D | C1  | 37474332 | 37476339 | 1052 | 293 | 32473.95 | 4.96 | -0.998 | 5 | chlo |
| <i>BnaC03.NF-YC11a</i> | BnaC03g37550D | C3  | 22991247 | 22993437 | 1077 | 287 | 31947.45 | 5.00 | -0.891 | 5 | chlo |
| <i>BnaC03.NF-YC11b</i> | BnaC03g37560D | C3  | 22999722 | 23001891 | 1021 | 287 | 31876.33 | 4.95 | -0.898 | 5 | chlo |
| <i>BnaC09.NF-YC11</i>  | BnaC09g48240D | C9  | 47154793 | 47156984 | 1330 | 302 | 33389.18 | 5.03 | -0.853 | 5 | chlo |
| <i>BnaA06.NF-YC13</i>  | BnaA06g36810D | A6  | 24060533 | 24061095 | 563  | 130 | 14755.12 | 9.99 | -0.589 | 0 | nucl |
| <i>BnaC07.NF-YC13</i>  | BnaC07g16980D | C7  | 22984339 | 22984728 | 390  | 129 | 14623.94 | 9.82 | -0.518 | 0 | cyto |

**Note:** Chrom., Chromosome; MW, molecular weight; PI, isoelectric point; plas, plasma membrane; cyto, cytoplasm; nucl, nucleus; mito, mitochondrion; chlo, chloroplast membrane

**Table S4. Non-synonymous (Ka) and synonymous (Ks) nucleotide substitution rates for the *NF-Y* coding loci in *Arabidopsis* and *B. napus***

| <i>Arabidopsis</i><br>ID | <i>Arabidopsis</i> gene<br>name | <i>B. napus</i> ID | <i>B. napus</i> gene name | Ka          | Ks          | Ka/Ks       |
|--------------------------|---------------------------------|--------------------|---------------------------|-------------|-------------|-------------|
| AT5G12840                | <i>AtNF-YA1</i>                 | BnaA02g01270D      | <i>BnaA02.NF-YA1</i>      | 0.123206444 | 0.363923937 | 0.338549986 |
|                          |                                 | BnaA03g04040D      | <i>BnaA03.NF-YA1</i>      | 0.113379103 | 0.399024259 | 0.284140877 |
|                          |                                 | BnaA10g29990D      | <i>BnaA10.NF-YA1</i>      | 0.086137438 | 0.453682105 | 0.189862983 |
|                          |                                 | BnaC02g04360D      | <i>BnaC02.NF-YA1</i>      | 0.200575809 | 0.535990039 | 0.374215553 |
|                          |                                 | BnaC03g05640D      | <i>BnaC03.NF-YA1</i>      | 0.090648897 | 0.394859789 | 0.229572369 |
|                          |                                 | BnaC09g44190D      | <i>BnaC09.NF-YA1</i>      | 0.081562819 | 0.46978933  | 0.173615733 |
| AT3G05690                | <i>AtNF-YA2</i>                 | BnaA03g29140D      | <i>BnaA03.NF-YA2</i>      | 0.089695461 | 0.236286725 | 0.379604318 |
|                          |                                 | BnaAnnng02740D     | <i>BnaAnn.NF-YA2</i>      | 0.082756096 | 0.235848573 | 0.350886568 |
|                          |                                 | BnaC05g46110D      | <i>BnaC05.NF-YA2a</i>     | 0.110122404 | 0.432598157 | 0.254560502 |
|                          |                                 | BnaC05g19190D      | <i>BnaC05.NF-YA2b</i>     | 0.089695461 | 0.236286725 | 0.379604318 |
| AT1G72830                | <i>AtNF-YA3</i>                 | BnaA02g16180D      | <i>BnaA02.NF-YA3</i>      | 0.092854126 | 0.381774624 | 0.243217123 |
|                          |                                 | BnaA07g30460D      | <i>BnaA07.NF-YA3</i>      | 0.096342883 | 0.397583178 | 0.242321327 |
|                          |                                 | BnaC02g21570D      | <i>BnaC02.NF-YA3</i>      | 0.057713923 | 0.396554157 | 0.145538565 |
|                          |                                 | BnaC04g27090D      | <i>BnaC04.NF-YA3</i>      | 0.568510165 | 1.027176765 | 0.553468677 |
|                          |                                 | BnaCnng68450D      | <i>BnaCnn.NF-YA3</i>      | 0.084005481 | 0.390937173 | 0.214882304 |
|                          |                                 | BnaC06g33980D      | <i>BnaC06.NF-YA3a</i>     | 0.122057951 | 0.407260383 | 0.299704945 |
|                          |                                 | BnaC06g33950D      | <i>BnaC06.NF-YA3b</i>     | 0.400651814 | 1.009180615 | 0.397007045 |
| AT2G34720                | <i>AtNF-YA4</i>                 | BnaA05g09110D      | <i>BnaA05.NF-YA4</i>      | 0.055388482 | 0.35121232  | 0.157706547 |
|                          |                                 | BnaC04g10470D      | <i>BnaC04.NF-YA4</i>      | 0.057921477 | 0.347937887 | 0.166470737 |



|           |                  |               |                       |             |             |             |
|-----------|------------------|---------------|-----------------------|-------------|-------------|-------------|
| AT1G54160 | <i>AtNF-YA5</i>  | BnaA06g01280D | <i>BnaA06.NF-YA5</i>  | 0.096088016 | 0.293035724 | 0.327905468 |
|           |                  | BnaA08g00840D | <i>BnaA08.NF-YA5</i>  | 0.09892116  | 0.26773276  | 0.369477235 |
|           |                  | BnaAnng31560D | <i>BnaAnn.NF-YA5</i>  | 0.11253172  | 0.363629865 | 0.309467759 |
|           |                  | BnaCnng30790D | <i>BnaCnn.NF-YA5</i>  | 0.089497011 | 0.350047728 | 0.255670881 |
|           |                  | BnaC06g10580D | <i>BnaC06.NF-YA5a</i> | 0.115658252 | 0.334091219 | 0.346187644 |
|           |                  | BnaC06g06950D | <i>BnaC06.NF-YA5b</i> | 0.143846681 | 0.273085089 | 0.52674674  |
| AT3G14020 | <i>AtNF-YA6</i>  | BnaA01g29650D | <i>BnaA01.NF-YA6</i>  | 0.135360039 | 0.407230764 | 0.332391486 |
|           |                  | BnaC01g37260D | <i>BnaC01.NF-YA6</i>  | 0.161708692 | 0.44600353  | 0.362572672 |
|           |                  | BnaCnng46640D | <i>BnaCnn.NF-YA6</i>  | 0.310501222 | 0.834205277 | 0.372212009 |
| AT1G30500 | <i>AtNF-YA7</i>  | BnaA09g26040D | <i>BnaA09.NF-YA7</i>  | 0.095063779 | 0.392823605 | 0.242001189 |
|           |                  | BnaC05g23480D | <i>BnaC05.NF-YA7</i>  | 0.100786029 | 0.408402511 | 0.246781119 |
| AT1G17590 | <i>AtNF-YA8</i>  | BnaA09g44920D | <i>BnaA09.NF-YA8</i>  | 0.125409141 | 0.295604306 | 0.424246664 |
| AT3G20910 | <i>AtNF-YA9</i>  | BnaA01g25500D | <i>BnaA01.NF-YA9</i>  | 0.166691594 | 0.323992561 | 0.514492043 |
|           |                  | BnaA03g35980D | <i>BnaA03.NF-YA9</i>  | 0.104666588 | 0.310372326 | 0.337229126 |
|           |                  | BnaA05g19990D | <i>BnaA05.NF-YA9</i>  | 0.128819569 | 0.312106595 | 0.412742222 |
|           |                  | BnaC03g41820D | <i>BnaC03.NF-YA9</i>  | 0.133212103 | 0.291257099 | 0.457369462 |
|           |                  | BnaC05g31370D | <i>BnaC05.NF-YA9</i>  | 0.103894636 | 0.319339745 | 0.325342014 |
| AT5G06510 | <i>AtNF-YA10</i> | BnaA10g24470D | <i>BnaA10.NF-YA10</i> | 0.154110067 | 0.33217843  | 0.463937609 |
|           |                  | BnaC09g49050D | <i>BnaC09.NF-YA10</i> | 0.130075029 | 0.374068741 | 0.347730282 |
| AT2G38880 | <i>AtNF-YB1</i>  | BnaA03g18200D | <i>BnaA03.NF-YB1</i>  | 0.066205861 | 0.642079383 | 0.103111645 |
|           |                  | BnaA05g06260D | <i>BnaA05.NF-YB1</i>  | 0.026055595 | 0.699719294 | 0.037237211 |
|           |                  | BnaC03g21730D | <i>BnaC03.NF-YB1</i>  | 0.127492277 | 0.776262735 | 0.164238564 |
|           |                  | BnaC04g06490D | <i>BnaC04.NF-YB1</i>  | 0.028179678 | 0.60428387  | 0.046633179 |
| AT5G47640 | <i>AtNF-YB2</i>  | BnaA02g25600D | <i>BnaA02.NF-YB2</i>  | 0.021341096 | 0.542844819 | 0.039313438 |
|           |                  | BnaA09g18400D | <i>BnaA09.NF-YB2</i>  | 0.053140933 | 0.65883763  | 0.080658619 |

|           |                 |               |                       |             |             |             |
|-----------|-----------------|---------------|-----------------------|-------------|-------------|-------------|
|           |                 | BnaC02g33400D | <i>BnaC02.NF-YB2</i>  | 0.029914234 | 0.614717775 | 0.048663363 |
|           |                 | BnaC07g20390D | <i>BnaC07.NF-YB2</i>  | 0.15305107  | 0.667759808 | 0.229200782 |
|           |                 | BnaC09g20320D | <i>BnaC09.NF-YB2</i>  | 0.042945541 | 0.634800297 | 0.067652049 |
| AT4G14540 | <i>AtNF-YB3</i> | BnaA01g28350D | <i>BnaA01.NF-YB3</i>  | 0.071749967 | 2.096129498 | 0.03422974  |
|           |                 | BnaA03g33970D | <i>BnaA03.NF-YB3</i>  | 0.095164179 | 1.082254924 | 0.087931389 |
|           |                 | BnaC01g35600D | <i>BnaC01.NF-YB3</i>  | 0.075475652 | 1.693158276 | 0.044576844 |
|           |                 | BnaC03g39380D | <i>BnaC03.NF-YB3</i>  | 0.109742558 | 1.279799715 | 0.085749791 |
|           |                 | BnaC05g37390D | <i>BnaC05.NF-YB3</i>  | 0.102870693 | 1.302235919 | 0.078995435 |
| AT1G09030 | <i>AtNF-YB4</i> | BnaC05g06570D | <i>BnaC05.NF-YB4</i>  | 0.062840476 | 0.411313097 | 0.152780148 |
| AT2G47810 | <i>AtNF-YB5</i> | BnaA03g21860D | <i>BnaA03.NF-YB5</i>  | 0.067572049 | 0.333462599 | 0.202637565 |
|           |                 | BnaA05g00200D | <i>BnaA05.NF-YB5</i>  | 0.071177129 | 0.435694181 | 0.163364883 |
|           |                 | BnaC04g00090D | <i>BnaC04.NF-YB5</i>  | 0.060853731 | 0.424551608 | 0.143336476 |
| AT5G47670 | <i>AtNF-YB6</i> | BnaA06g35340D | <i>BnaA06.NF-YB6</i>  | 0.078734964 | 0.318895365 | 0.246899054 |
|           |                 | BnaA09g18420D | <i>BnaA09.NF-YB6</i>  | 0.0860104   | 0.339749556 | 0.25315824  |
|           |                 | BnaC07g20410D | <i>BnaC07.NF-YB6</i>  | 0.077979497 | 0.32319918  | 0.241273808 |
|           |                 | BnaC09g20350D | <i>BnaC09.NF-YB6</i>  | 0.075377191 | 0.401508403 | 0.187735028 |
| AT2G13570 | <i>AtNF-YB7</i> | BnaA03g38390D | <i>BnaA03.NF-YB7</i>  | 0.060116495 | 0.58257099  | 0.103191707 |
|           |                 | BnaA09g08330D | <i>BnaA09.NF-YB7</i>  | 0.092067404 | 0.561638115 | 0.163926559 |
|           |                 | BnaC03g45220D | <i>BnaC03.NF-YB7</i>  | 0.057903174 | 0.566459221 | 0.102219492 |
|           |                 | BnaC09g08600D | <i>BnaC09.NF-YB7</i>  | 0.096594591 | 0.514347497 | 0.187800255 |
| AT2G37060 | <i>AtNF-YB8</i> | BnaA03g16960D | <i>BnaA03.NF-YB8</i>  | 0.024195647 | 0.519860385 | 0.046542586 |
|           |                 | BnaC03g20500D | <i>BnaC03.NF-YB8</i>  | 0.027181577 | 0.468270547 | 0.058046737 |
|           |                 | BnaCnng76740D | <i>BnaCnn.NF-YB8</i>  | 0.112764055 | 0.667858351 | 0.168844268 |
|           |                 | BnaA04g21270D | <i>BnaA04.NF-YB8a</i> | 0.109969019 | 0.756128763 | 0.145436894 |
|           |                 | BnaA04g21250D | <i>BnaA04.NF-YB8b</i> | 0.055869978 | 0.600688936 | 0.093009834 |

|           |                  |               |                       |             |             |             |
|-----------|------------------|---------------|-----------------------|-------------|-------------|-------------|
| AT1G21970 | <i>AtNF-YB9</i>  | BnaA07g10770D | <i>BnaA07.NF-YB9</i>  | 0.133651589 | 0.372078279 | 0.359202879 |
|           |                  | BnaAnng04140D | <i>BnaAnn.NF-YB9</i>  | 0.141221022 | 0.451235599 | 0.31296516  |
|           |                  | BnaC07g14150D | <i>BnaC07.NF-YB9</i>  | 0.13450359  | 0.39070561  | 0.34425815  |
|           |                  | BnaCnng59920D | <i>BnaCnn.NF-YB9</i>  | 0.155006326 | 0.484280048 | 0.320075804 |
| AT3G53340 | <i>AtNF-YB10</i> | BnaA09g33640D | <i>BnaA09.NF-YB10</i> | 0.067636791 | 0.64453695  | 0.104938578 |
|           |                  | BnaC08g24430D | <i>BnaC08.NF-YB10</i> | 0.064919396 | 0.583278426 | 0.11130087  |
| AT2G27470 | <i>AtNF-YB11</i> | BnaA07g13230D | <i>BnaA07.NF-YB11</i> | 0.111953809 | 0.439657499 | 0.254638689 |
|           |                  | BnaC03g47130D | <i>BnaC03.NF-YB11</i> | 0.175594224 | 0.464327703 | 0.378168743 |
|           |                  | BnaC04g16850D | <i>BnaC04.NF-YB11</i> | 0.118420342 | 0.414308974 | 0.285826158 |
| AT5G08190 | <i>AtNF-YB12</i> | BnaA10g23160D | <i>BnaA10.NF-YB12</i> | 0.052605826 | 0.766766884 | 0.068607327 |
|           |                  | BnaAnng06230D | <i>BnaAnn.NF-YB12</i> | 0.059478157 | 0.755103555 | 0.078768213 |
|           |                  | BnaC02g01260D | <i>BnaC02.NF-YB12</i> | 0.040909936 | 0.700346819 | 0.058413824 |
|           |                  | BnaC09g47720D | <i>BnaC09.NF-YB12</i> | 0.044497434 | 0.611055381 | 0.072820623 |
| AT5G23090 | <i>AtNF-YB13</i> | BnaA09g05430D | <i>BnaA09.NF-YB13</i> | 0.024436551 | 0.43695398  | 0.05592477  |
|           |                  | BnaC09g05000D | <i>BnaC09.NF-YB13</i> | 0.024480868 | 0.383119218 | 0.063898825 |
| AT5G63470 | <i>AtNF-YC4</i>  | BnaA06g16420D | <i>BnaA06.NF-YC4</i>  | 0.078420002 | 1.336788947 | 0.058662964 |
|           |                  | BnaAnng22700D | <i>BnaAnn.NF-YC4</i>  | 0.071783343 | 0.866964626 | 0.082798468 |
|           |                  | BnaC03g50810D | <i>BnaC03.NF-YC4</i>  | 0.072795672 | 0.919600095 | 0.07916014  |
|           |                  | BnaC08g20340D | <i>BnaC08.NF-YC4</i>  | 0.072937439 | 1.25650267  | 0.058047978 |
|           |                  | BnaCnng15880D | <i>BnaCnn.NF-YC4</i>  | 0.104856762 | 1.091525183 | 0.096064446 |
| AT1G08970 | <i>AtNF-YC9</i>  | BnaA06g05230D | <i>BnaA06.NF-YC9</i>  | 0.064934937 | 0.772524486 | 0.084055507 |
|           |                  | BnaA08g26690D | <i>BnaA08.NF-YC9</i>  | 0.065604843 | 0.5585245   | 0.117460995 |
|           |                  | BnaA09g48620D | <i>BnaA09.NF-YC9</i>  | 0.022906186 | 0.928760126 | 0.024663189 |
|           |                  | BnaC05g06520D | <i>BnaC05.NF-YC9</i>  | 0.040635441 | 0.657009939 | 0.061849051 |
|           |                  | BnaC08g42880D | <i>BnaC08.NF-YC9</i>  | 0.096649615 | 1.33604327  | 0.072340183 |

|           |                  |               |                        |             |             |             |
|-----------|------------------|---------------|------------------------|-------------|-------------|-------------|
|           |                  | BnaCnng06510D | <i>BnaCnn.NF-YC9</i>   | 0.051065937 | 0.652484434 | 0.078263839 |
| AT1G07980 | <i>AtNF-YC10</i> | BnaA06g04450D | <i>BnaA06.NF-YC10</i>  | 0.124296411 | 0.569634163 | 0.218203926 |
|           |                  | BnaA09g49120D | <i>BnaA09.NF-YC10</i>  | 0.134666801 | 0.520784828 | 0.25858434  |
|           |                  | BnaC05g05650D | <i>BnaC05.NF-YC10</i>  | 0.138155856 | 0.799182189 | 0.172871541 |
|           |                  | BnaC08g43430D | <i>BnaC08.NF-YC10</i>  | 0.104334602 | 0.505678145 | 0.206326105 |
|           |                  |               |                        |             |             |             |
| AT3G12480 | <i>AtNF-YC11</i> | BnaA01g30580D | <i>BnaA01.NF-YC11</i>  | 0.07596472  | 0.389199158 | 0.195182128 |
|           |                  | BnaA03g32260D | <i>BnaA03.NF-YC11</i>  | 0.085501735 | 0.357857763 | 0.238926589 |
|           |                  | BnaA10g23530D | <i>BnaA10.NF-YC11</i>  | 0.190063509 | 0.752055453 | 0.252725392 |
|           |                  | BnaC01g38370D | <i>BnaC01.NF-YC11</i>  | 0.082479048 | 0.418247156 | 0.197201694 |
|           |                  | BnaC09g48240D | <i>BnaC09.NF-YC11</i>  | 0.193291066 | 0.793276087 | 0.243661783 |
|           |                  | BnaC03g37550D | <i>BnaC03.NF-YC11a</i> | 0.083992688 | 0.380505975 | 0.220739473 |
|           |                  | BnaC03g37560D | <i>BnaC03.NF-YC11b</i> | 0.082274188 | 0.364130862 | 0.225946759 |
| AT5G43250 | <i>AtNF-YC13</i> | BnaA06g36810D | <i>BnaA06.NF-YC13</i>  | 0.132230004 | 0.789131531 | 0.167563959 |
|           |                  | BnaC07g16980D | <i>BnaC07.NF-YC13</i>  | 0.099905629 | 0.807475036 | 0.123725967 |

**Table S5. FPKM values of the *NF-Y* family genes in leaf and root of *B. napus* under N, P and K deficiencies based on the RNA-seq data**

| Gene name             | Gene ID        | Leaf_CK | Leaf_LN | Leaf_LP | Leaf_LK | Root_CK | Root_LN | Root_LP | Root_LK |
|-----------------------|----------------|---------|---------|---------|---------|---------|---------|---------|---------|
| <i>BnaA02.NF-YA1</i>  | BnaA02g01270D  | 2.13    | 1.20    | 0.68    | 1.35    | 0.76    | 0.92    | 0.85    | 0.71    |
| <i>BnaA03.NF-YA1</i>  | BnaA03g04040D  | 0.06    | 0.00    | 0.00    | 0.00    | 0.00    | 0.00    | 0.00    | 0.00    |
| <i>BnaA10.NF-YA1</i>  | BnaA10g29990D  | 4.34    | 10.42   | 4.48    | 2.98    | 6.17    | 7.89    | 5.71    | 5.86    |
| <i>BnaC02.NF-YA1</i>  | BnaC02g04360D  | 0.37    | 0.52    | 0.62    | 0.17    | 0.14    | 0.00    | 0.20    | 0.10    |
| <i>BnaC03.NF-YA1</i>  | BnaC03g05640D  | 0.78    | 2.23    | 1.33    | 0.94    | 2.44    | 1.95    | 3.15    | 2.36    |
| <i>BnaC09.NF-YA1</i>  | BnaC09g44190D  | 4.49    | 8.78    | 4.44    | 4.23    | 6.54    | 5.95    | 5.43    | 5.78    |
| <i>BnaA03.NF-YA2</i>  | BnaA03g29140D  | 0.71    | 6.11    | 1.17    | 0.67    | 19.90   | 184.26  | 127.73  | 37.71   |
| <i>BnaAnn.NF-YA2</i>  | BnaAnnng02740D | 0.28    | 3.89    | 0.52    | 0.22    | 0.35    | 14.39   | 1.65    | 0.28    |
| <i>BnaC05.NF-YA2a</i> | BnaC05g46110D  | 0.06    | 0.14    | 0.07    | 0.00    | 0.20    | 0.72    | 0.21    | 0.20    |
| <i>BnaC05.NF-YA2b</i> | BnaC05g19190D  | 0.52    | 4.71    | 1.28    | 0.88    | 21.19   | 173.82  | 162.28  | 44.08   |
| <i>BnaA02.NF-YA3</i>  | BnaA02g16180D  | 0.40    | 3.30    | 0.72    | 0.61    | 1.09    | 16.56   | 3.41    | 2.12    |
| <i>BnaA07.NF-YA3</i>  | BnaA07g30460D  | 0.71    | 4.02    | 1.21    | 0.67    | 2.73    | 25.60   | 6.76    | 4.63    |
| <i>BnaC02.NF-YA3</i>  | BnaC02g21570D  | 2.05    | 10.29   | 4.15    | 3.47    | 10.49   | 40.67   | 16.23   | 10.70   |
| <i>BnaC04.NF-YA3</i>  | BnaC04g27090D  | 0.00    | 0.00    | 0.00    | 0.00    | 0.00    | 0.00    | 0.00    | 0.00    |
| <i>BnaC06.NF-YA3a</i> | BnaC06g33980D  | 2.06    | 11.67   | 2.83    | 2.63    | 5.37    | 52.07   | 13.41   | 8.70    |
| <i>BnaC06.NF-YA3b</i> | BnaC06g33950D  | 0.00    | 0.00    | 0.00    | 2.38    | 0.00    | 0.00    | 0.00    | 0.08    |
| <i>BnaCnn.NF-YA3</i>  | BnaCnnng68450D | 0.28    | 6.23    | 0.70    | 0.94    | 4.18    | 50.00   | 10.53   | 5.31    |
| <i>BnaA05.NF-YA4</i>  | BnaA05g09110D  | 28.47   | 51.66   | 27.77   | 18.87   | 13.82   | 25.47   | 15.71   | 11.57   |
| <i>BnaC04.NF-YA4</i>  | BnaC04g10470D  | 33.27   | 62.13   | 42.52   | 31.95   | 8.25    | 15.39   | 9.91    | 8.45    |
| <i>BnaA06.NF-YA5</i>  | BnaA06g01280D  | 0.31    | 5.87    | 0.94    | 0.58    | 0.38    | 1.32    | 0.42    | 0.28    |
| <i>BnaA08.NF-YA5</i>  | BnaA08g00840D  | 0.17    | 0.58    | 0.15    | 0.02    | 0.32    | 0.77    | 0.31    | 0.25    |

|                       |               |       |       |       |       |       |       |       |       |
|-----------------------|---------------|-------|-------|-------|-------|-------|-------|-------|-------|
| <i>BnaAnn.NF-YA5</i>  | BnaAnng31560D | 0.06  | 2.36  | 0.72  | 0.16  | 0.75  | 0.57  | 1.03  | 0.30  |
| <i>BnaC06.NF-YA5a</i> | BnaC06g10580D | 1.03  | 5.07  | 1.84  | 1.57  | 2.29  | 4.18  | 2.88  | 1.47  |
| <i>BnaC06.NF-YA5b</i> | BnaC06g06950D | 0.64  | 5.52  | 1.05  | 0.92  | 0.49  | 2.30  | 1.35  | 0.85  |
| <i>BnaCnn.NF-YA5</i>  | BnaCnng30790D | 0.84  | 1.21  | 0.60  | 0.67  | 0.73  | 0.94  | 1.19  | 0.69  |
| <i>BnaA01.NF-YA6</i>  | BnaA01g29650D | 0.00  | 0.12  | 0.00  | 0.00  | 0.03  | 0.39  | 0.09  | 0.00  |
| <i>BnaC01.NF-YA6</i>  | BnaC01g37260D | 0.99  | 36.71 | 2.33  | 1.76  | 5.95  | 90.87 | 10.69 | 7.29  |
| <i>BnaCnn.NF-YA6</i>  | BnaCnng46640D | 0.00  | 0.00  | 0.00  | 0.00  | 0.00  | 0.00  | 0.00  | 0.00  |
| <i>BnaA09.NF-YA7</i>  | BnaA09g26040D | 5.55  | 19.41 | 47.02 | 8.07  | 4.17  | 8.17  | 20.08 | 2.92  |
| <i>BnaC05.NF-YA7</i>  | BnaC05g23480D | 0.61  | 9.35  | 8.45  | 1.45  | 7.85  | 12.79 | 18.11 | 5.13  |
| <i>BnaA09.NF-YA8</i>  | BnaA09g44920D | 0.00  | 0.04  | 0.00  | 0.02  | 0.88  | 0.86  | 0.89  | 1.49  |
| <i>BnaA01.NF-YA9</i>  | BnaA01g25500D | 0.00  | 0.04  | 0.07  | 0.11  | 0.00  | 0.00  | 0.00  | 0.11  |
| <i>BnaA03.NF-YA9</i>  | BnaA03g35980D | 0.73  | 5.62  | 1.23  | 0.47  | 4.46  | 5.49  | 4.23  | 3.24  |
| <i>BnaA05.NF-YA9</i>  | BnaA05g19990D | 0.00  | 0.09  | 0.00  | 0.00  | 0.00  | 0.08  | 0.00  | 0.00  |
| <i>BnaC03.NF-YA9</i>  | BnaC03g41820D | 17.87 | 25.51 | 14.93 | 12.84 | 16.14 | 17.93 | 15.29 | 11.17 |
| <i>BnaC05.NF-YA9</i>  | BnaC05g31370D | 4.25  | 12.49 | 5.51  | 4.38  | 4.59  | 11.84 | 7.67  | 5.23  |
| <i>BnaA10.NF-YA10</i> | BnaA10g24470D | 0.45  | 4.50  | 0.17  | 0.05  | 0.11  | 15.00 | 0.38  | 0.11  |
| <i>BnaC09.NF-YA10</i> | BnaC09g49050D | 0.57  | 12.31 | 1.08  | 0.26  | 0.71  | 38.50 | 3.12  | 1.35  |
| <i>BnaA03.NF-YB1</i>  | BnaA03g18200D | 0.28  | 1.04  | 0.57  | 0.33  | 0.63  | 0.13  | 0.56  | 0.52  |
| <i>BnaA05.NF-YB1</i>  | BnaA05g06260D | 4.20  | 15.29 | 6.59  | 5.41  | 15.87 | 18.21 | 16.28 | 14.73 |
| <i>BnaC03.NF-YB1</i>  | BnaC03g21730D | 0.24  | 1.34  | 0.40  | 0.40  | 0.16  | 0.25  | 0.29  | 0.16  |
| <i>BnaC04.NF-YB1</i>  | BnaC04g06490D | 2.41  | 7.42  | 3.40  | 3.63  | 5.74  | 5.37  | 5.95  | 4.06  |
| <i>BnaA02.NF-YB2</i>  | BnaA02g25600D | 37.87 | 54.30 | 38.80 | 32.88 | 11.68 | 11.42 | 10.50 | 11.70 |
| <i>BnaA09.NF-YB2</i>  | BnaA09g18400D | 44.97 | 53.46 | 35.97 | 42.97 | 11.85 | 16.61 | 10.32 | 9.66  |
| <i>BnaC02.NF-YB2</i>  | BnaC02g33400D | 14.24 | 40.53 | 26.63 | 12.47 | 9.81  | 19.98 | 16.58 | 9.65  |
| <i>BnaC07.NF-YB2</i>  | BnaC07g20390D | 0.00  | 0.00  | 0.00  | 0.00  | 0.00  | 0.00  | 0.00  | 0.00  |
| <i>BnaC09.NF-YB2</i>  | BnaC09g20320D | 17.39 | 18.62 | 15.73 | 16.44 | 8.04  | 8.11  | 6.27  | 9.21  |

[illegible]

|                       |               |       |       |       |       |       |       |       |       |
|-----------------------|---------------|-------|-------|-------|-------|-------|-------|-------|-------|
| <i>BnaA09.NF-YB10</i> | BnaA09g33640D | 4.12  | 8.16  | 5.34  | 4.24  | 17.75 | 24.24 | 31.82 | 24.55 |
| <i>BnaC08.NF-YB10</i> | BnaC08g24430D | 1.89  | 4.68  | 7.09  | 1.59  | 12.43 | 20.20 | 21.42 | 19.30 |
| <i>BnaA07.NF-YB11</i> | BnaA07g13230D | 4.16  | 5.45  | 2.55  | 3.82  | 9.33  | 8.29  | 9.68  | 9.41  |
| <i>BnaC03.NF-YB11</i> | BnaC03g47130D | 4.63  | 4.64  | 4.05  | 4.50  | 6.70  | 5.16  | 6.51  | 6.28  |
| <i>BnaC04.NF-YB11</i> | BnaC04g16850D | 9.48  | 10.69 | 7.56  | 8.31  | 17.24 | 18.29 | 20.93 | 20.88 |
| <i>BnaA10.NF-YB12</i> | BnaA10g23160D | 2.66  | 9.76  | 3.22  | 3.62  | 10.22 | 14.34 | 11.60 | 9.67  |
| <i>BnaAnn.NF-YB12</i> | BnaAnng06230D | 0.03  | 0.06  | 0.00  | 0.00  | 0.31  | 0.24  | 0.12  | 0.28  |
| <i>BnaC02.NF-YB12</i> | BnaC02g01260D | 1.73  | 3.90  | 2.06  | 1.85  | 7.79  | 8.63  | 7.79  | 8.38  |
| <i>BnaC09.NF-YB12</i> | BnaC09g47720D | 4.82  | 14.08 | 4.37  | 4.46  | 18.51 | 16.78 | 17.26 | 16.65 |
| <i>BnaA09.NF-YB13</i> | BnaA09g05430D | 2.54  | 7.93  | 3.48  | 3.16  | 10.01 | 7.90  | 7.23  | 7.11  |
| <i>BnaC09.NF-YB13</i> | BnaC09g05000D | 3.89  | 8.69  | 5.14  | 4.45  | 10.73 | 8.92  | 9.14  | 7.71  |
| <i>BnaA06.NF-YC4</i>  | BnaA06g16420D | 14.69 | 2.96  | 5.14  | 10.66 | 0.96  | 0.35  | 0.32  | 0.26  |
| <i>BnaAnn.NF-YC4</i>  | BnaAnng22700D | 34.98 | 25.03 | 32.45 | 36.16 | 37.83 | 34.95 | 37.58 | 30.11 |
| <i>BnaC03.NF-YC4</i>  | BnaC03g50810D | 33.32 | 20.03 | 38.54 | 34.95 | 30.25 | 22.53 | 29.88 | 27.92 |
| <i>BnaC08.NF-YC4</i>  | BnaC08g20340D | 32.60 | 10.60 | 17.66 | 31.02 | 5.87  | 2.94  | 3.27  | 3.57  |
| <i>BnaCnn.NF-YC4</i>  | BnaCnng15880D | 1.58  | 3.19  | 1.87  | 2.24  | 3.94  | 4.11  | 2.99  | 4.38  |
| <i>BnaA06.NF-YC9</i>  | BnaA06g05230D | 1.09  | 17.30 | 2.16  | 1.19  | 1.81  | 12.17 | 3.55  | 2.88  |
| <i>BnaA08.NF-YC9</i>  | BnaA08g26690D | 0.19  | 1.69  | 0.51  | 0.36  | 4.76  | 11.45 | 9.59  | 4.65  |
| <i>BnaA09.NF-YC9</i>  | BnaA09g48620D | 11.06 | 15.51 | 7.63  | 9.94  | 18.98 | 23.43 | 17.14 | 20.50 |
| <i>BnaC05.NF-YC9</i>  | BnaC05g06520D | 3.11  | 20.14 | 3.47  | 2.38  | 1.34  | 3.25  | 1.78  | 1.42  |
| <i>BnaC08.NF-YC9</i>  | BnaC08g42880D | 20.84 | 54.77 | 19.77 | 21.23 | 50.07 | 54.97 | 48.24 | 53.57 |
| <i>BnaCnn.NF-YC9</i>  | BnaCnng06510D | 0.07  | 0.07  | 0.47  | 0.05  | 0.27  | 0.84  | 1.24  | 0.26  |
| <i>BnaA06.NF-YC10</i> | BnaA06g04450D | 2.88  | 9.01  | 2.51  | 3.69  | 5.67  | 5.43  | 4.86  | 4.12  |
| <i>BnaA09.NF-YC10</i> | BnaA09g49120D | 1.49  | 0.56  | 1.83  | 2.19  | 2.26  | 1.66  | 2.02  | 1.44  |
| <i>BnaC05.NF-YC10</i> | BnaC05g05650D | 6.51  | 9.12  | 4.75  | 8.40  | 12.42 | 10.00 | 10.57 | 10.19 |
| <i>BnaC08.NF-YC10</i> | BnaC08g43430D | 1.14  | 1.46  | 0.87  | 1.07  | 2.70  | 1.49  | 1.53  | 1.01  |



|                        |               |       |       |        |        |       |       |       |       |
|------------------------|---------------|-------|-------|--------|--------|-------|-------|-------|-------|
| <i>BnaA01.NF-YC11</i>  | BnaA01g30580D | 4.99  | 8.51  | 3.70   | 4.14   | 10.83 | 11.36 | 11.37 | 9.18  |
| <i>BnaA03.NF-YC11</i>  | BnaA03g32260D | 5.86  | 11.13 | 5.11   | 6.33   | 7.23  | 6.18  | 5.15  | 5.57  |
| <i>BnaA10.NF-YC11</i>  | BnaA10g23530D | 4.94  | 9.09  | 5.10   | 4.97   | 9.74  | 9.82  | 10.27 | 9.20  |
| <i>BnaC01.NF-YC11</i>  | BnaC01g38370D | 4.80  | 13.12 | 4.76   | 4.58   | 14.99 | 16.88 | 13.60 | 11.61 |
| <i>BnaC03.NF-YC11a</i> | BnaC03g37550D | 4.48  | 9.59  | 4.75   | 5.29   | 8.59  | 9.17  | 8.74  | 7.07  |
| <i>BnaC03.NF-YC11b</i> | BnaC03g37560D | 96.91 | 2.90  | 224.92 | 188.01 | 30.01 | 0.62  | 21.12 | 36.09 |
| <i>BnaC09.NF-YC11</i>  | BnaC09g48240D | 9.81  | 17.90 | 10.62  | 8.92   | 23.07 | 27.02 | 18.41 | 19.23 |
| <i>BnaA06.NF-YC13</i>  | BnaA06g36810D | 5.23  | 14.79 | 5.22   | 8.75   | 14.65 | 11.05 | 13.01 | 14.23 |
| <i>BnaC07.NF-YC13</i>  | BnaC07g16980D | 24.04 | 33.03 | 16.27  | 27.00  | 24.77 | 28.32 | 29.64 | 37.42 |

---

**Note:** CK, full strength Afdaling's solution; LN, nitrogen deficiency; LP, phosphorus deficiency; LK, potassium deficiency

**Table S6. Primers used for quantitative real-time PCR in this study**

| <b>Gene name</b>               | <b>Forward primer</b>    | <b>Reverse primer</b>  |
|--------------------------------|--------------------------|------------------------|
| <i>BnaA01.NF-YA6</i>           | GCTTCTTGGCCTCTACATGG     | GGCATTGACGAAGATTGGTT   |
| <i>BnaA01.NF-YC11</i>          | CGAGATGGAACTCGAGACCG     | TGCCTAACTCCATAGGCCAG   |
| <i>BnaA02.NF-YA3</i>           | AGTCCAACAGGAAAGCGAAA     | ATTGGGAAACCTGAAAACCTGG |
| <i>BnaA03.NF-YA2</i>           | GAAGGTCTTCCCTCTGCTCCA    | TGGCACAACCTCTTGGACTCT  |
| <i>BnaA07.NF-YA3</i>           | AAGCTTGAAGGTGGTGGATG     | TGTCATTGCGCCTGACTTAG   |
| <i>BnaA09.NF-YC9</i>           | ATTGTTCCGAGGGAGGATCT     | CTGATCAGGTCCCTGTTGCT   |
| <i>BnaA10.NF-YC11</i>          | CGGTATCACGATGCCTTCAC     | ACCCGGATACTCCTCTGGTT   |
| <i>BnaC01.NF-YC11</i>          | CAGTCCCAGCTGCAGACAA      | TCCTCGTCTATCCTCTTACCCA |
| <i>BnaC05.NF-YA2b</i>          | CTGAAACGGTTGTAAGAGCATCTA | GCATATGAACAACACACGATC  |
| <i>BnaC05.NF-YC9</i>           | CTTGACACGACACCCACCTTT    | CATGGCTCCTGACTGTCCAT   |
| <i>BnaC06.NF-YA3a</i>          | TTGCTCCTCCGCAGACTAAT     | CATGGTATTGCTTCGCATTG   |
| <i>BnaC08.NF-YC4</i>           | GTCCTACCAACGCCAAGAGA     | GGTGAGCTCGAGGATGAA     |
| <i>BnaC08.NF-YC9</i>           | TTCCGAGGGAGGATCTGAGG     | AAGCTAATTCTCCACCAGGGTT |
| <i>BnaC09.NF-YB12</i>          | TGAACAGCGGAGCAGAGATG     | AGTTGCTGCTCTTGATCTGGT  |
| <i>BnaC09.NF-YC11</i>          | TGCAAGCTGACGAGGATGTT     | CATTACCGAGACCGTGACCG   |
| <i>BnaCnm.NF-YA3</i>           | AAAGGCCAAGAGGATCTGGT     | ATATCAGCACCGTCGGAAAC   |
| <i>EF1-<math>\alpha</math></i> | GCCTGGTATGGTTGTGACCT     | GAAGTTAGCAGCACCTTGG    |
